# Supplementary material for: PLGA Nanoparticles Co-encapsulating NY-ESO-1 Peptides and IMM60 Induce Robust CD8 and CD4 T Cell and B Cell Responses
Source: PubMed Central journal article supplement (PMC7947615; doi:10.3389/fimmu.2021.641703), 2021-02-25
Supplement: Table_1.pdf [file Table_1.pdf]

**Supplementary Table-1** : HLA types reported to present an epitope within the relevant peptides are listed according to <http://tools.iedb.org/population/>. HLA allele frequency within all Europe without any specific country or ethnicity is written in paranthesis.

European Coverage Class-I HLA

| Epitope                                   | Coverage | HLA allele<br>(genotypic frequency (%)) |                       |                       |                        |                       |                       |                       |                       |                       |                       |                       |                       | Total HLA hits |
|-------------------------------------------|----------|-----------------------------------------|-----------------------|-----------------------|------------------------|-----------------------|-----------------------|-----------------------|-----------------------|-----------------------|-----------------------|-----------------------|-----------------------|----------------|
|                                           | Class I  | HLA-A*02:01<br>(28.14)                  | HLA-A*24:02<br>(9.42) | HLA-A*68:01<br>(3.34) | HLA-B*07:02<br>(11.91) | HLA-B*35:01<br>(5.65) | HLA-B*35:08<br>(0.48) | HLA-B*49:01<br>(1.36) | HLA-B*51:01<br>(5.21) | HLA-B*52:01<br>(1.33) | HLA-C*03:03<br>(4.75) | HLA-C*03:04<br>(6.01) | HLA-C*12:02<br>(1.32) |                |
| Peptide-1<br>SRLLFYLAMPFATPMEAEARRSLAQ    | 64.49%   | -                                       | +                     | +                     | +                      | +                     | +                     | -                     | +                     | +                     | +                     | +                     | +                     | 10             |
| Peptide-2:<br>PVPGVLLKEFTVSGNILTIRLTAADHR | 8.77%    | -                                       | -                     | +                     | -                      | -                     | -                     | +                     | -                     | -                     | -                     | -                     | -                     | 2              |
| Peptide-3: SLLMWITQC                      | 47.00%   | +                                       | -                     | -                     | -                      | -                     | -                     | -                     | -                     | -                     | -                     | -                     | -                     | 1              |
| Epitope set                               | 83.68%   | 1                                       | 1                     | 2                     | 1                      | 1                     | 1                     | 1                     | 1                     | 1                     | 1                     | 1                     | 1                     | 13             |

European Coverage Class-II HLA

| Epitope                                   | Coverage | HLA allele<br>(genotypic frequency (%)) |                           |                          |                          |                          |                           |                          |                          |                          | Total HLA hits |
|-------------------------------------------|----------|-----------------------------------------|---------------------------|--------------------------|--------------------------|--------------------------|---------------------------|--------------------------|--------------------------|--------------------------|----------------|
|                                           | Class II | HLA-DPB1*04:01<br>(38.47)               | HLA-DPB1*04:02<br>(10.89) | HLA-DQB1*04:01<br>(1.05) | HLA-DRB1*01:01<br>(8.22) | HLA-DRB1*04:01<br>(6.20) | HLA-DRB1*07:01<br>(13.08) | HLA-DRB1*09:01<br>(1.27) | HLA-DRB1*11:01<br>(6.78) | HLA-DRB1*16:01<br>(4.12) |                |
| Peptide -1:<br>SRLLFYLAMPFATPMEAEARRSLAQ  | 84.45%   | +                                       | +                         | +                        | +                        | +                        | +                         | +                        | -                        | -                        | 7              |
| Peptide-2:<br>PVPGVLLKEFTVSGNILTIRLTAADHR | 42.78%   | -                                       | -                         | -                        | +                        | +                        | -                         | -                        | +                        | +                        | 4              |
| Peptide-3: SLLMWITQC                      | 69.64%   | -                                       | -                         | -                        | -                        | -                        | -                         | -                        | -                        | -                        | 2              |
| Epitope set                               | 88.63%   | 1                                       | 1                         | 1                        | 2                        | 2                        | 1                         | 1                        | 1                        | 1                        | 11             |

- : not restricted

**Supplementary Table-2: A)**TCRs coded by mRNA's used in in vitro stimulation assays. Known recognizing minimal peptides, and binding HLA types. **B)** Physical characteristics of each peptide.

A)

| TCR name                        | Specific peptide       | position | HLA type  |
|---------------------------------|------------------------|----------|-----------|
| CD8-pST1-hTCR-NYE#12            | ATPMEAEARRSLAQ         | 97-111   | B*0702    |
| CD4-pST1-hTCR-NYE#3             | PVPGVLLKEFTVSGNILTIRLT | 117-139  | DRB1*0401 |
| CD8-pST1-NY-ESO 1-A2-TCR-VhuCmu | SLLMWITQC              | 157-165  | A*0201    |

B)

| Name      | Position           | Sequence                    | Hydropathy<br>Top is hydrophilic<br>Bottom is hydrophobic | Iso-electric point                                  |
|-----------|--------------------|-----------------------------|-----------------------------------------------------------|-----------------------------------------------------|
|           |                    |                             |                                                           | solubility                                          |
| Peptide 1 | 85-111<br>(27mer)  | SRLLFYLAMPFATPMEAEARRSLAQ   |                                                           | pH 6.82                                             |
|           |                    |                             |                                                           | ≤5mg/ml in H <sub>2</sub> O<br>≤10mg/ml in DMSO     |
| Peptide 2 | 117-143<br>(27mer) | PVPGVLLKEFTVSGNILTIRLTAADHR |                                                           | pH 10.52                                            |
|           |                    |                             |                                                           | ≤10mg/ml in H <sub>2</sub> O<br>≤5mg/ml in DMSO     |
| Peptide 3 | 157-165<br>(9mer)  | SLLMWITQC                   |                                                           | pH 3.00                                             |
|           |                    |                             |                                                           | Undissolved in H <sub>2</sub> O<br>≤10mg/ml in DMSO |

Color codes:

Acidic

Aromatic

Basic

Aliphatic

Polar

Cysteine

**Supplementary Table-3: A) Nanoparticles containing single peptides. B) Nanoparticles containing three peptide mix.** Peptides used in production, peptide content after production and washing, and size characteristics of each nanoparticle batch are mentioned in different rows.

A)

| Encapsulation of single peptides by PLGA |                             |                                                |                        |       |
|------------------------------------------|-----------------------------|------------------------------------------------|------------------------|-------|
| Peptide                                  | ug peptide used per mg PLGA | Peptide content of nanoparticle (ug pep/mg NP) | Particle Size $\pm$ SD | IMM60 |
| Peptide 1                                | 5                           | 4.2                                            | 177 $\pm$ 50           | +     |
|                                          | 5                           | 1.3                                            | 211 $\pm$ 70           | +     |
|                                          | 10                          | 3.1                                            | 178 $\pm$ 47           | +     |
|                                          | 15                          | 4.6                                            | 215 $\pm$ 66           | +     |
|                                          | 22.5                        | 12.8                                           | 213 $\pm$ 51           | +     |
|                                          | 22.5                        | 12.4                                           | 208 $\pm$ 49           | -     |
| Peptide 2                                | 5                           | 1                                              | 184 $\pm$ 54           | +     |
|                                          | 10                          | 9.7                                            | 203 $\pm$ 53           | +     |
|                                          | 20                          | 22.4                                           | 224 $\pm$ 71           | +     |
| Peptide 3                                | 5                           | 5.8                                            | 198 $\pm$ 52           | +     |
|                                          | 10                          | 7.1                                            | 201 $\pm$ 55           | +     |
|                                          | 20                          | 11.3                                           | 218 $\pm$ 59           | +     |

B)

| Encapsulation of multiple peptides by PLGA |                                                |           |           |               |       |
|--------------------------------------------|------------------------------------------------|-----------|-----------|---------------|-------|
| ug each peptide used per mg PLGA           | Peptide content of nanoparticle (ug pep/mg NP) |           |           | Particle Size | IMM60 |
|                                            | Peptide 1                                      | Peptide 2 | Peptide 3 |               |       |
|                                            |                                                |           |           |               |       |
| 5                                          | 6.5                                            | 4.3       | 6.8       | 189 $\pm$ 54  | +     |
| 5                                          | 7.1                                            | 4         | 4         | 203 $\pm$ 58  | +     |
| 10                                         | 8.2                                            | 7.2       | 8.3       | 211 $\pm$ 66  | +     |
| 10                                         | 7.7                                            | 6.4       | 9.5       | 212 $\pm$ 73  | +     |
| 10                                         | 7.2                                            | 6.2       | 9.3       | 219 $\pm$ 60  | +     |
| 10                                         | 11.4                                           | 13.4      | 11.5      | 227 $\pm$ 61  | +     |
| 10                                         | 7.6                                            | 7.1       | 7.6       |               |       |
| 10                                         | 6.2                                            | 5.5       | 7.5       |               |       |
| 10                                         | 8.8                                            | 5.9       | 12        | 199 $\pm$ 51  | +     |
| 10                                         | 6.1                                            | 4.3       | 11        | 201 $\pm$ 53  | -     |

**Supplementary Table-4:A)** Known B35 binding epitope (underlined) within the peptide-1 and DRB1\*0401 epitope (underlined) within peptide-2 shown with other overlapping peptides used in figure-3. **B)** HLA genotyping results of patients #6 and #7 in figure-3

A)

| Peptide sequence                     | Position | Name      |
|--------------------------------------|----------|-----------|
| SRLLFY <u>LAMPFATPME</u> AELARRSLAQ  | 85-111   | Peptide-1 |
| SRLLFY <u>LAMPFATPME</u> A           | 85-102   |           |
| EFY <u>LAMPFATPME</u> AE             | 89-103   |           |
| <u>AMPFATPME</u> AELARR              | 93-107   |           |
| <u>ATPME</u> AELARRSLAQ              | 97-111   |           |
| PVPGV <u>LLKEFTVSGN</u> ILTIRLTAADHR | 117-143  | Peptide-2 |
| <u>VLLKEFTVSGN</u> ILTIRLT           | 121-138  |           |

B)

|            |                     |                |         |            |         |         |     |
|------------|---------------------|----------------|---------|------------|---------|---------|-----|
| Patient 06 | HLA Type - Class I  | A3             | A1      | <b>B35</b> | B8      | Cw4     | Cw7 |
|            | HLA Type – Class II | <b>DRB1*01</b> | DRB1*03 | DRB3*01    | DQB1*02 | DQB1*05 |     |

|            |                     |              |                                               |         |         |           |           |
|------------|---------------------|--------------|-----------------------------------------------|---------|---------|-----------|-----------|
| Patient 07 | HLA Type - Class I  | A1           | A2                                            | B8      | B27     | Cw2       | Cw7       |
|            | HLA Type – Class II | DRB1*0301/11 | <b>DRB1*0401/</b><br>13/16/21/26/<br>33/35/38 | DRB3*01 | DRB4*01 | DQB1*0201 | DQB1*0302 |



**Supplementary Table-6:** PLGA NY-ESO-1 nanoparticle related microscopic findings in liver and lung –Scheduled Euthanasia Animals (Day 7).

| Group                                                 | Males    |           |           | Females  |           |           |
|-------------------------------------------------------|----------|-----------|-----------|----------|-----------|-----------|
|                                                       | 1        | 2         | 5         | 1        | 2         | 5         |
| <b>Dose (mg/kg)</b>                                   | <b>0</b> | <b>50</b> | <b>50</b> | <b>0</b> | <b>50</b> | <b>50</b> |
| <b>No. animals examined</b>                           | <b>5</b> | <b>5</b>  | <b>5</b>  | <b>5</b> | <b>5</b>  | <b>5</b>  |
| <b>Liver (No. Examined)</b>                           | (5)      | (5)       | (5)       | (5)      | (5)       | (5)       |
| Apoptosis/necrosis; hepatocellular                    | 0        | 2         | 3         | 0        | 1         | 0         |
| Minimal                                               | 0        | 2         | 2         | 0        | 1         | 0         |
| Mild                                                  | 0        | 0         | 1         | 0        | 0         | 0         |
| Infiltration, mononuclear cell; vascular/perivascular | 0        | 0         | 5         | 0        | 0         | 5         |
| Minimal                                               | 0        | 0         | 5         | 0        | 0         | 2         |
| Mild                                                  | 0        | 0         | 0         | 0        | 0         | 3         |
| Granulomatous inflammation                            | 0        | 0         | 1         | 0        | 0         | 0         |
| Minimal                                               | 0        | 0         | 0         | 0        | 0         | 0         |
| Mild                                                  | 0        | 0         | 1         | 0        | 0         | 0         |
| Thrombus, minimal                                     | 0        | 0         | 1         | 0        | 0         | 0         |
| <b>Lung (No. Examined)</b>                            | (5)      | (5)       | (5)       | (5)      | (5)       | (5)       |
| Infiltration, mononuclear cell; vascular/perivascular | 0        | 0         | 1         | 0        | 0         | 2         |
| Minimal                                               | 0        | 0         | 1         | 0        | 0         | 2         |
| Mild                                                  | 0        | 0         | 0         | 0        | 0         | 0         |
